# Supplementary material
Source: PubMed Central journal article supplement (PMC4914672)

## Supplementary information for

# Multifactorial basis for *in vitro* acquisition of miltefosine resistance in *Leishmania donovani*: a genomic appraisal

Vacchina, P.<sup>1</sup>, Norris-Mullins, B.<sup>1</sup>, Abengózar, M. A.<sup>2</sup>, Viamontes, C.G.<sup>1</sup>, Sarro, J.<sup>3</sup>, Stephens,  
M. T.<sup>3</sup>, Pfrender, M. E.<sup>3</sup>, Rivas, L.<sup>2</sup> and Morales, M. A.<sup>1#</sup>

<sup>1</sup>Eck Institute for Global Health, Department of Biological Sciences, University of Notre Dame,  
Notre Dame, IN 46556, USA

<sup>2</sup> Centro de Investigaciones Biológicas (CIB), CSIC, Madrid 28040, Spain

<sup>3</sup> Genomics and Bioinformatics Core Facility, University of Notre Dame, Notre Dame, IN 46556,  
USA

**#Corresponding author:** Miguel A. Morales, PhD

278 Galvin Life Science, Department of Biological Sciences

University of Notre Dame, Notre Dame, IN 46556, USA

Phone: (office) +1-574-631-7296

email: miguel.morales@nd.edu

**Running title:** NGS of miltefosine resistant *Leishmania*

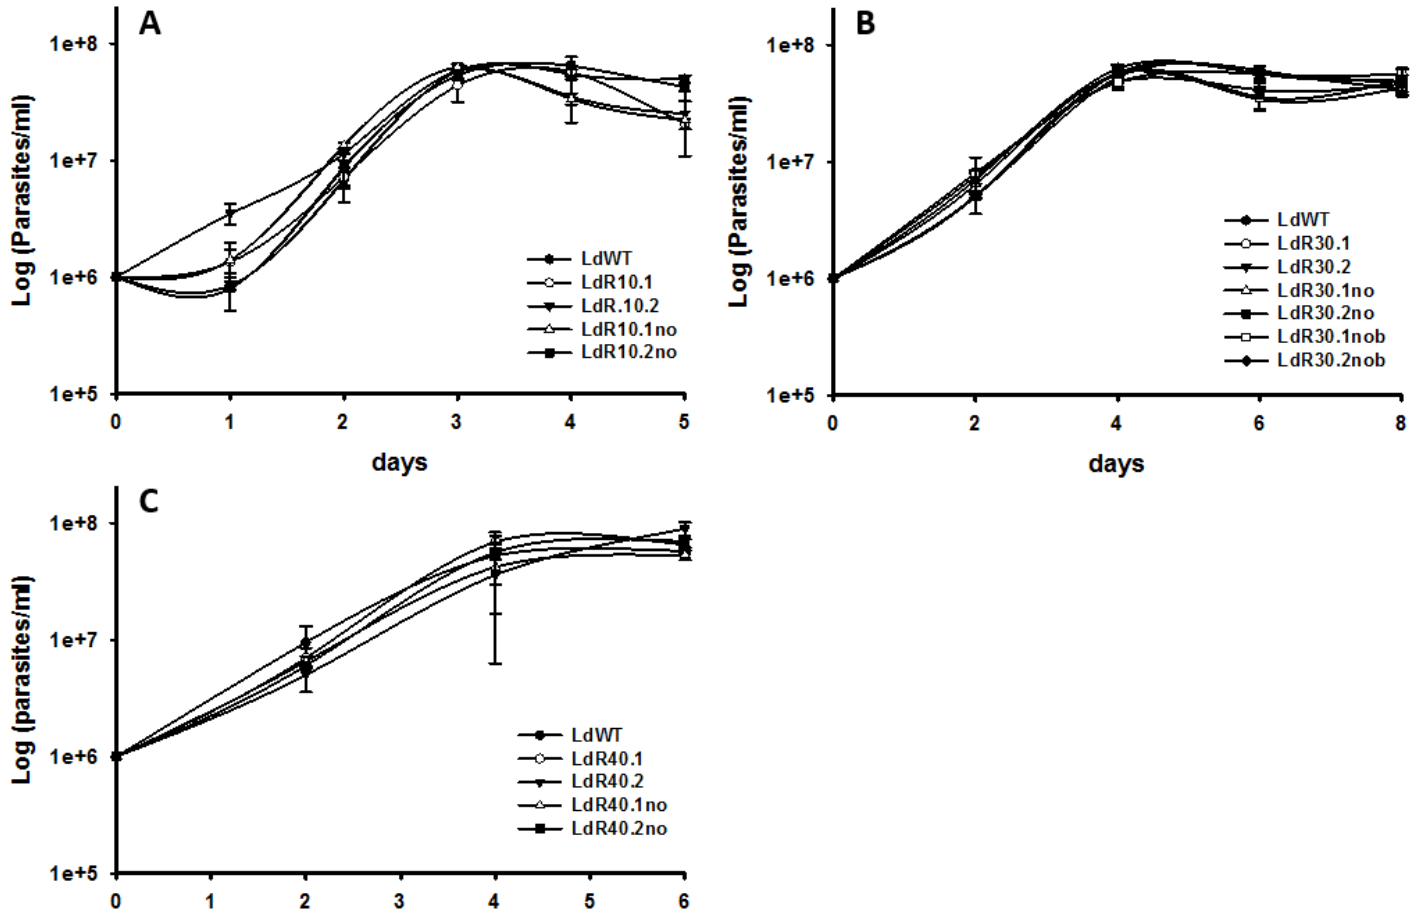

**Figure S1. Growth curves of *L. donovani* promastigotes cultured in the presence or absence of HePC.**

Growth rate was determined by microscopical counting in triplicate and compared to WT strain. Results represent the average of three independent experiments and error bars indicate standard deviation. Parasites step-wise selected with 10  $\mu$ M (A), 30  $\mu$ M (B) or 40  $\mu$ M (C) of HePC and subsequently cultivated with or without the drug pressure (LdR##no).

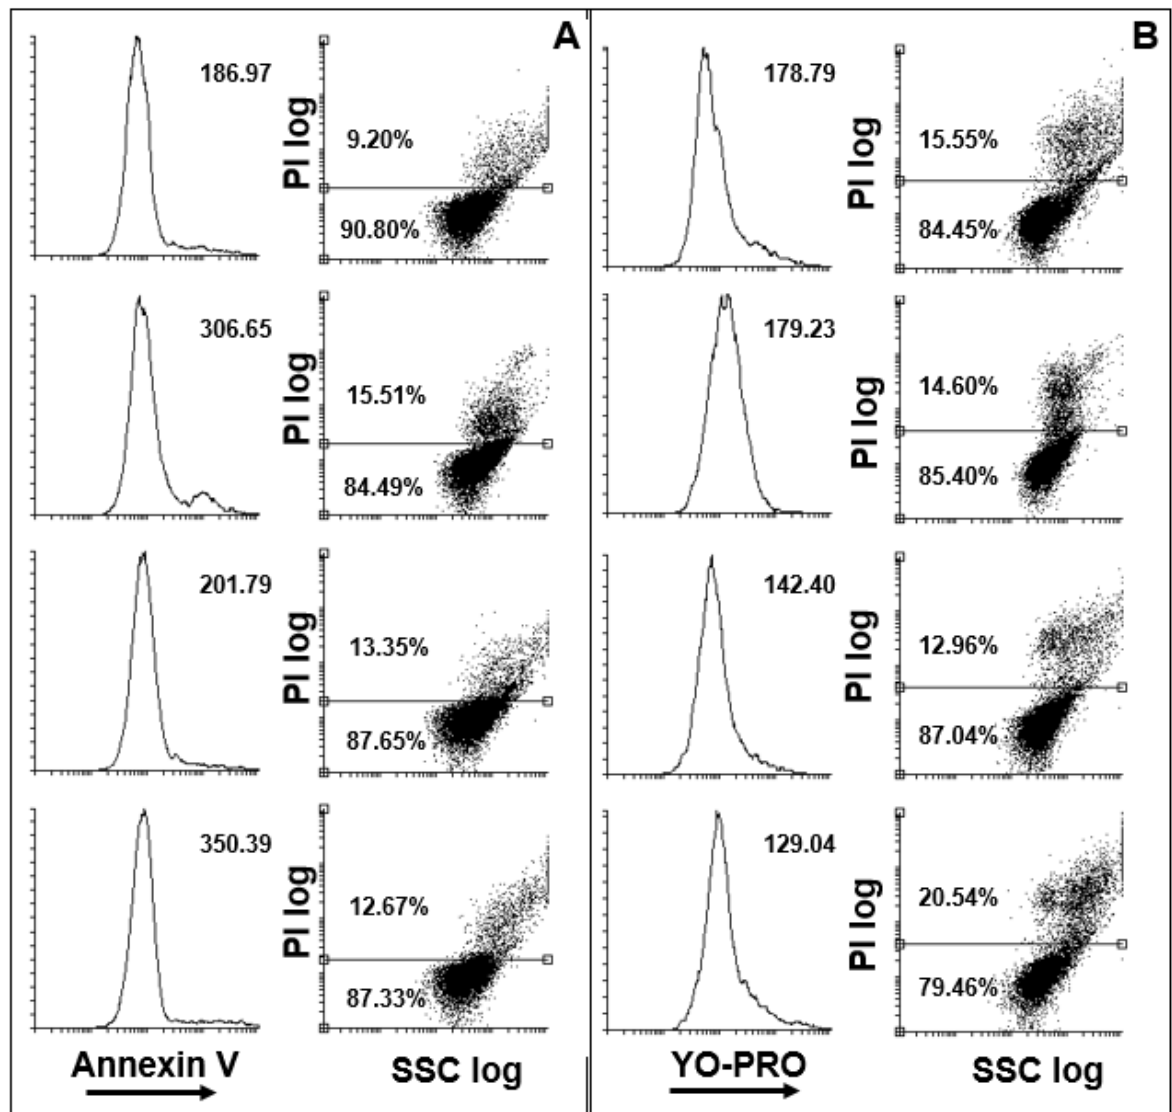

**Figure S2. Viability and apoptosis induction by HePC selection.** Flow cytometry analysis of HePC-resistant *L. donovani* promastigotes: WT, R30.1, R30.1no and LdR30.1nob using two different apoptotic markers: Annexin V (panel A) and YO-PRO (panel B). 10,000 events per sample were recorded.

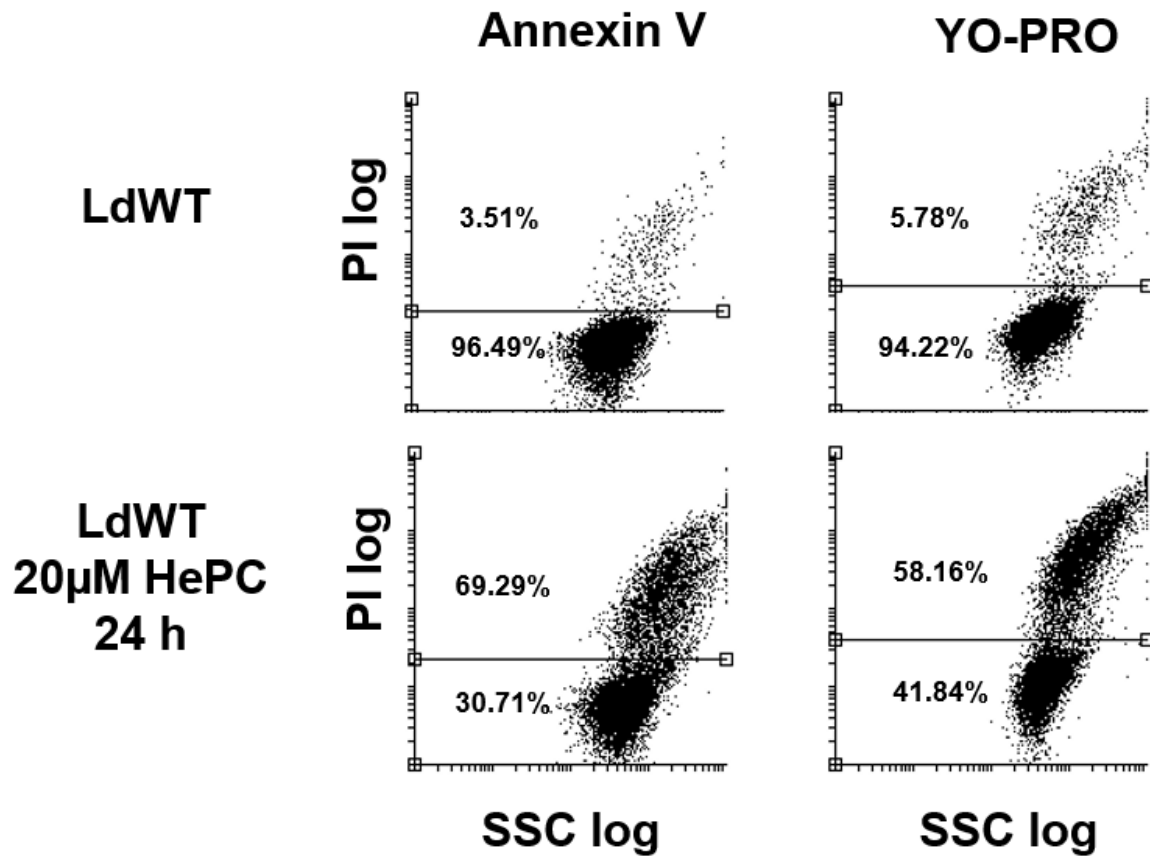

**Figure S3.** Flow cytometry analysis of *L. donovani* promastigotes treated with HePC. WT parasites were incubated with or without 20  $\mu$ M HePC for 24 h and subsequently analyzed by flow cytometry using the fluorescent markers YO-PRO and Annexin-V. Death extent was quantified by measuring percentage of cells positive for propidium iodide in treated and non-treated parasites. Dot plots show 10,000 events per sample.

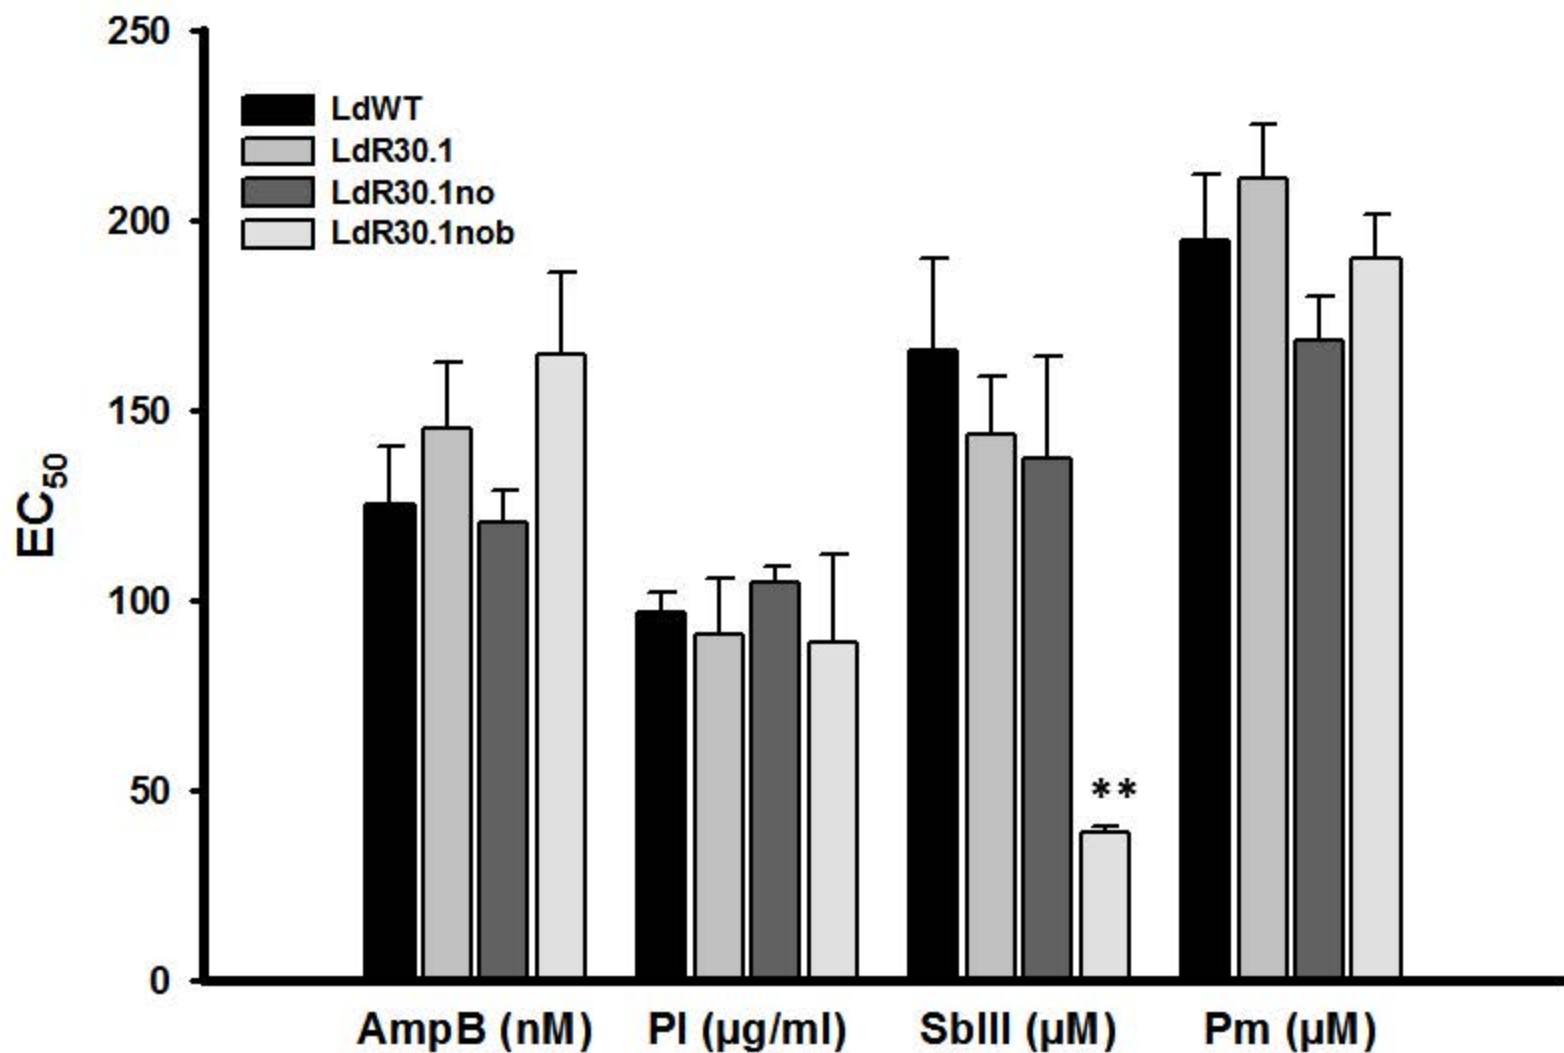

**Figure S4. Cross-resistance to reference compounds.** HePC-resistant promastigotes do not present cross-resistance to alternative anti-leishmanial agents as compared to the WT. In one case (LdR30.1nob) an increased susceptibility to SbIII was observed (\*\* $p < 0.05$ ). Results represent the average of three independent experiments and error bars indicate standard deviation.

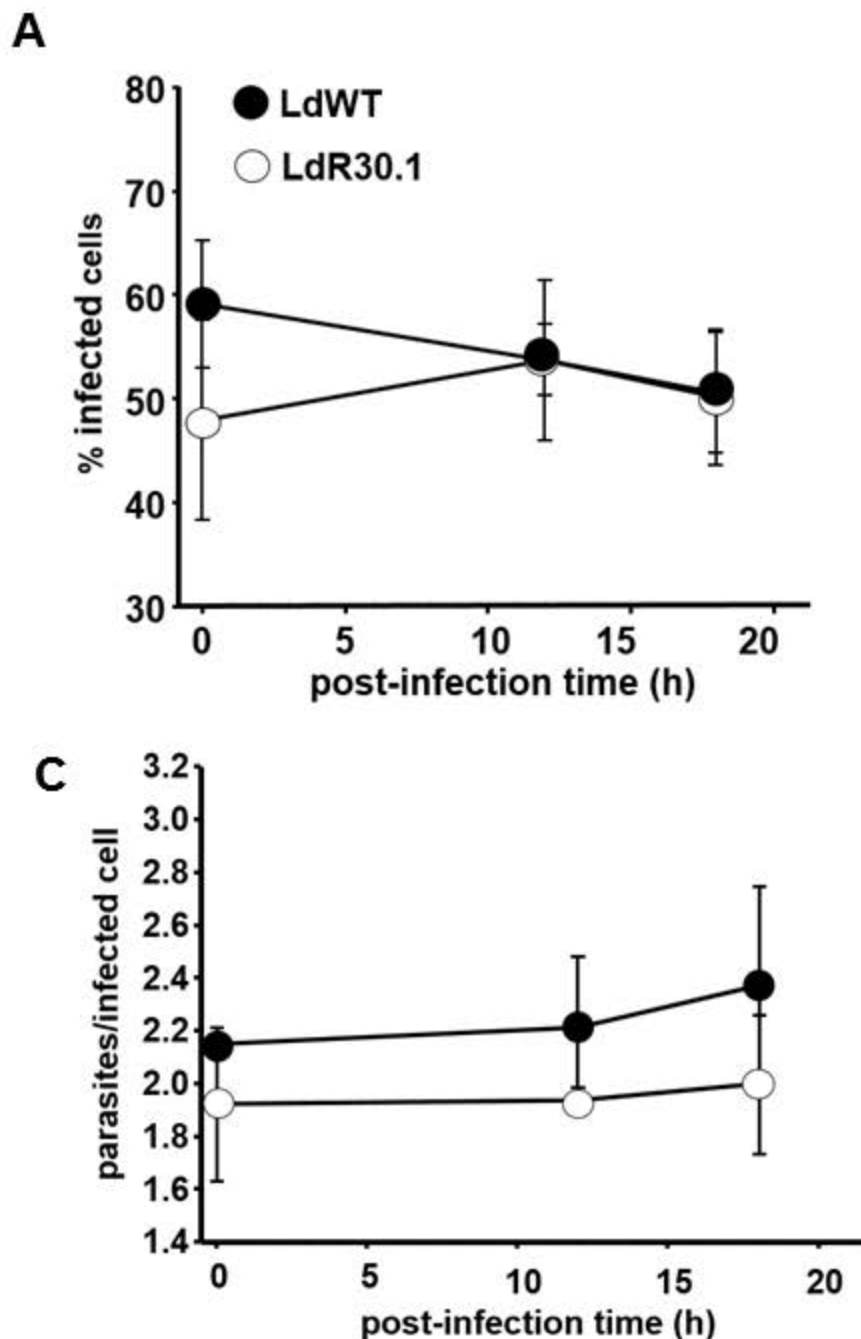

**B**

**C**

**Figure S5. In vitro infectivity of HePC-resistant lines.** RAW264.7 murine macrophages were equally infected by WT and LdR30.1 resistant parasites. Ficoll enriched metacyclic parasites were incubated in the presence of macrophages at a 10:1 MOI (parasite:macrophage) for 8 h. Afterwards, cells were washed to remove free parasites and samples were collected at 0h, 12h and 18h post-infection. Samples were stained and infection was determined by manual counting. Panels: A) Percentage of infected macrophages. B) Number of parasites/100 cells. C) Number of parasites per infected cell. Results are the average of triplicate experiments  $\pm$  standard deviation.

**Figure S6. Heatmap based on chromosome copy number comparing WT, R30.1, R30.1no and R30.1nob.** Read depth was calculated, and normalized to a value of 2 for disomic chromosomes.

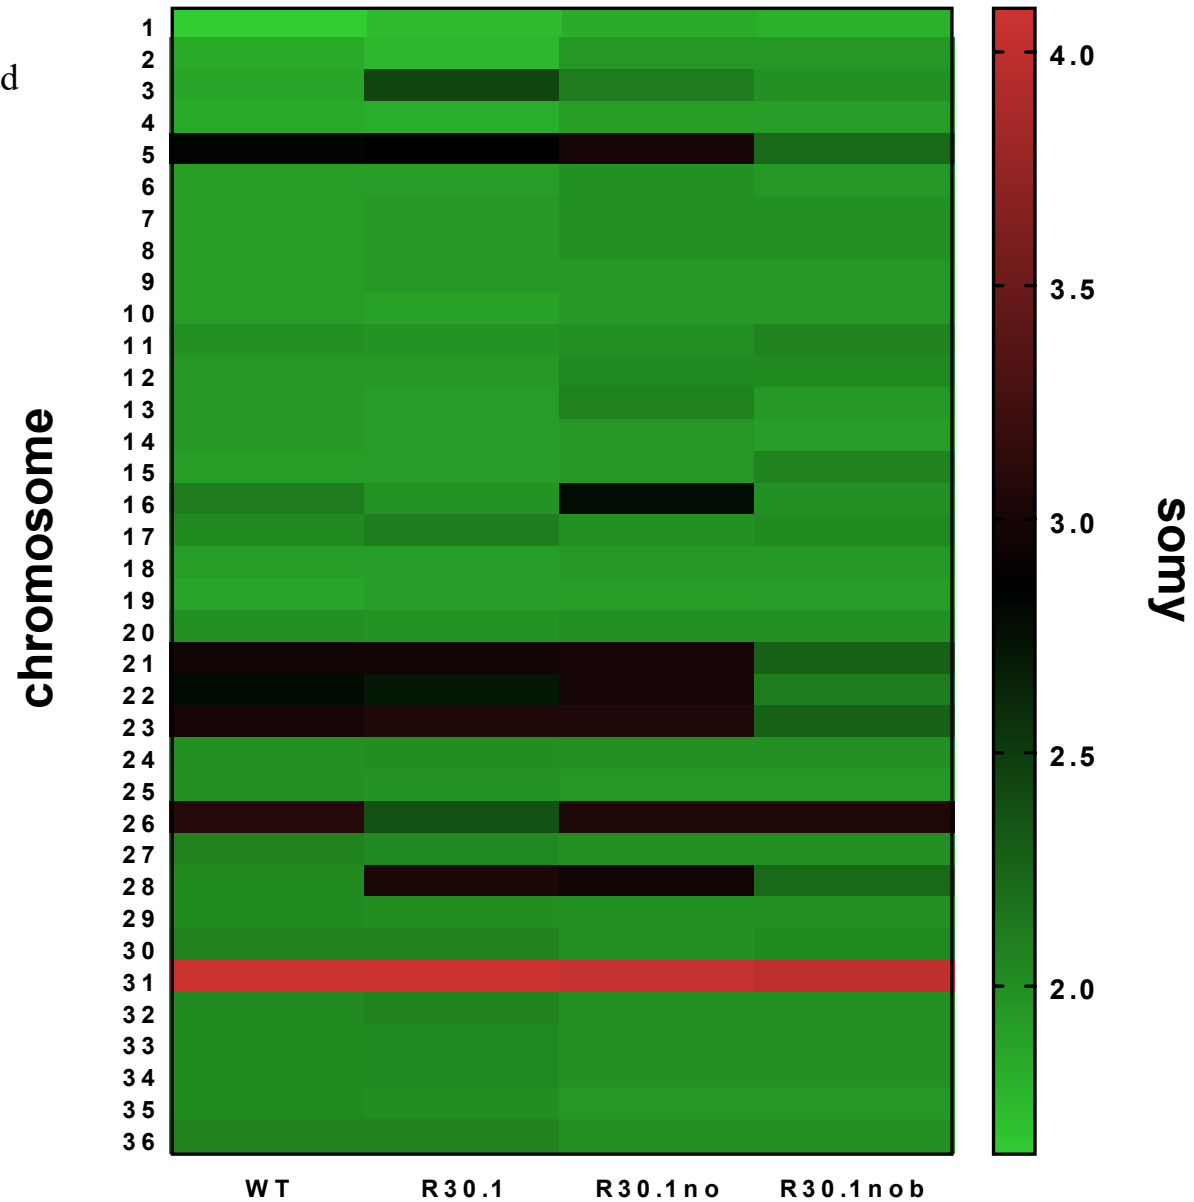

Supplement: AAC.00478-16_zac007165295so1.pdf [file AAC.00478-16_zac007165295so1.pdf]
